# Supplementary material for: Essential oil composition of Callistemon citrinus (Curtis) and its protective efficacy against Tribolium castaneum (Herbst) (Coleoptera: Tenebrionidae)
Source: PubMed Central journal article supplement (PMC9390898; doi:10.1371/journal.pone.0270084), 2022-08-19
Supplement: pone.0270084.s003.pdf [file pone.0270084.s003.pdf]

6/7/2018  
Bioassay

: Fumigation toxicity ✓

Target Pest

: Tribolium castaneum adult ✓

Treatment source

: Callistemon citrinus essential oil

Concentrations

: 40µl/L, 80µl/L, 120µl/L, 160µl/L, 200µl/L

Study period

: 3h, 6h, 9h, 12h, 24h

Replication

: 5

No. of Insect/Replicate : 10.

| Concentrations<br>&<br>Replicates | Insect Mortality<br>Exposure Time |    |    |     |     |
|-----------------------------------|-----------------------------------|----|----|-----|-----|
|                                   | 3h                                | 6h | 9h | 12h | 24h |
| 40µl/L<br>R <sub>1</sub>          | 0                                 | 1  | 2  | 4   | 5   |
| R <sub>2</sub>                    | 0                                 | 2  | 4  | 4   | 5   |
| R <sub>3</sub>                    | 0                                 | 1  | 3  | 3   | 5   |
| R <sub>4</sub>                    | 0                                 | 1  | 3  | 3   | 5   |
| R <sub>5</sub>                    | 0                                 | 1  | 3  | 4   | 6   |

Done By  
M. RAMACHANDRAN  
M. R. M.

Confirmed.....

  
3/7/2018.

800h/L

|                | 3h | 6h | 9h | 12h | 24h |
|----------------|----|----|----|-----|-----|
| R <sub>1</sub> | 0  | 1  | 5  | 8   | 9   |
| R <sub>2</sub> | 0  | 2  | 6  | 6   | 8   |
| R <sub>3</sub> | 0  | 2  | 6  | 7   | 8   |
| R <sub>4</sub> | 0  | 1  | 6  | 6   | 8   |
| R <sub>5</sub> | 0  | 2  | 6  | 7   | 8   |

1200h/L

|                |   |   |   |   |    |
|----------------|---|---|---|---|----|
| R <sub>1</sub> | 0 | 3 | 8 | 8 | 9  |
| R <sub>2</sub> | 0 | 4 | 7 | 8 | 9  |
| R <sub>3</sub> | 0 | 2 | 8 | 8 | 9  |
| R <sub>4</sub> | 0 | 3 | 6 | 9 | 10 |
| R <sub>5</sub> | 0 | 3 | 7 | 8 | 9  |

Done By  
M. RAMACHANDRAN  
M.D. / m.

Continued .....  
*[Signature]*  
8/7/2018

|         |                | 3h | 6h | 9h | 12h | 24h |
|---------|----------------|----|----|----|-----|-----|
| 160µL/L | R <sub>1</sub> | 2  | 5  | 10 | 10  | 10  |
|         | R <sub>2</sub> | 1  | 4  | 10 | 10  | 10  |
|         | R <sub>3</sub> | 1  | 6  | 10 | 10  | 10  |
|         | R <sub>4</sub> | 0  | 4  | 10 | 10  | 10  |
|         | R <sub>5</sub> | 0  | 5  | 10 | 10  | 10  |
| 200µL/L | R <sub>1</sub> | 2  | 7  | 10 | 10  | 10  |
|         | R <sub>2</sub> | 3  | 7  | 10 | 10  | 10  |
|         | R <sub>3</sub> | 2  | 6  | 10 | 10  | 10  |
|         | R <sub>4</sub> | 2  | 6  | 10 | 10  | 10  |
|         | R <sub>5</sub> | 2  | 6  | 10 | 10  | 10  |
| Control | R <sub>1</sub> | 0  | 0  | 0  | 0   | 1   |
|         | R <sub>2</sub> | 0  | 0  | 0  | 0   | 0   |
|         | R <sub>3</sub> | 0  | 0  | 0  | 0   | 0   |
|         | R <sub>4</sub> | 0  | 0  | 0  | 0   | 0   |
|         | R <sub>5</sub> | 0  | 0  | 0  | 0   | 1   |

Done BY  
M. RAMACHANDRAN  
M.R.M.

*[Signature]*  
8/7/2018

18/7/18

Bioassay

Fumigation Toxicity

Target Pest

Tribolium castaneum Larvae ✓

Treatment source

Callistemon citrinus essential oil.

Concentrations

40µl/L, 80µl/L, 120µl/L, 160µl/L, 200µl/L, 240µl/L, 280µl/L, 320µl/L.

Study period

3h, 6h, 9h, 12h, 24h, 36h, 48h ✓

Replication

5 ✓

No. of insect/replicate

: 10.

| Concentration & Replication | Larval mortality |    |    |     |     |     |     |
|-----------------------------|------------------|----|----|-----|-----|-----|-----|
|                             | Exposure time    |    |    |     |     |     |     |
|                             | 3h               | 6h | 9h | 12h | 24h | 36h | 48h |
| R <sub>1</sub>              | 0                | 0  | 0  | 0   | 1   | 2   | 2   |
| R <sub>2</sub>              | 0                | 0  | 1  | 1   | 1   | 1   | 3   |
| R <sub>3</sub>              | 0                | 0  | 0  | 1   | 1   | 1   | 2   |
| R <sub>4</sub>              | 0                | 0  | 0  | 0   | 0   | 1   | 2   |
| R <sub>5</sub>              | 0                | 0  | 0  | 0   | 1   | 2   | 2   |

Done BY  
M. RAMACHANDRAN  
M.R.M.

Continued...

~~Signature~~  
21/7/18

|         | 3h             | 6h | 9h | 12h | 24h | 36h | 48h |
|---------|----------------|----|----|-----|-----|-----|-----|
| 80ml/L  | R <sub>1</sub> | 0  | 0  | 0   | 1   | 2   | 4   |
|         | R <sub>2</sub> | 0  | 0  | 1   | 2   | 3   | 3   |
|         | R <sub>3</sub> | 0  | 0  | 1   | 1   | 2   | 4   |
|         | R <sub>4</sub> | 0  | 0  | 0   | 1   | 2   | 4   |
|         | R <sub>5</sub> | 0  | 0  | 0   | 2   | 3   | 3   |
| 120ml/L | R <sub>1</sub> | 0  | 0  | 0   | 3   | 3   | 5   |
|         | R <sub>2</sub> | 0  | 0  | 1   | 2   | 3   | 4   |
|         | R <sub>3</sub> | 0  | 0  | 1   | 2   | 2   | 5   |
|         | R <sub>4</sub> | 0  | 0  | 1   | 1   | 2   | 5   |
|         | R <sub>5</sub> | 0  | 0  | 0   | 1   | 2   | 4   |
| 160ml/L | R <sub>1</sub> | 0  | 1  | 2   | 2   | 3   | 5   |
|         | R <sub>2</sub> | 0  | 0  | 1   | 2   | 2   | 5   |
|         | R <sub>3</sub> | 0  | 1  | 1   | 2   | 3   | 6   |
|         | R <sub>4</sub> | 0  | 1  | 1   | 2   | 3   | 5   |
|         | R <sub>5</sub> | 0  | 0  | 0   | 3   | 3   | 6   |
| 200ml/L | R <sub>1</sub> | 0  | 1  | 2   | 2   | 4   | 6   |
|         | R <sub>2</sub> | 0  | 1  | 1   | 2   | 3   | 5   |
|         | R <sub>3</sub> | 0  | 1  | 1   | 3   | 3   | 5   |
|         | R <sub>4</sub> | 0  | 1  | 1   | 3   | 3   | 6   |
|         | R <sub>5</sub> | 0  | 1  | 2   | 3   | 3   | 7   |

Done BY  
M. RAMACHANDRAN  
M. D. M.

Continued - ... *[Signature]*

|         | 3h             | 6h | 9h | 12h | 24h | 36h | 48h |
|---------|----------------|----|----|-----|-----|-----|-----|
| 240h/L  | R <sub>1</sub> | 0  | 2  | 2   | 4   | 4   | 8   |
|         | R <sub>2</sub> | 0  | 1  | 1   | 3   | 4   | 7   |
|         | R <sub>3</sub> | 0  | 1  | 2   | 3   | 3   | 6   |
|         | R <sub>4</sub> | 0  | 1  | 1   | 2   | 4   | 7   |
|         | R <sub>5</sub> | 0  | 1  | 2   | 3   | 3   | 8   |
| 280h/L  | R <sub>1</sub> | 0  | 2  | 2   | 4   | 4   | 9   |
|         | R <sub>2</sub> | 0  | 1  | 1   | 3   | 4   | 8   |
|         | R <sub>3</sub> | 0  | 2  | 2   | 4   | 4   | 8   |
|         | R <sub>4</sub> | 0  | 1  | 2   | 4   | 5   | 8   |
|         | R <sub>5</sub> | 0  | 1  | 3   | 3   | 4   | 8   |
| 320h/L  | R <sub>1</sub> | 0  | 2  | 3   | 4   | 5   | 7   |
|         | R <sub>2</sub> | 0  | 1  | 2   | 4   | 6   | 9   |
|         | R <sub>3</sub> | 0  | 3  | 3   | 5   | 5   | 6   |
|         | R <sub>4</sub> | 0  | 1  | 3   | 4   | 4   | 6   |
|         | R <sub>5</sub> | 0  | 2  | 2   | 4   | 5   | 7   |
| Control | R <sub>1</sub> | 0  | 0  | 0   | 0   | 0   | 1   |
|         | R <sub>2</sub> | 0  | 0  | 0   | 0   | 1   | 1   |
|         | R <sub>3</sub> | 0  | 0  | 0   | 0   | 0   | 0   |
|         | R <sub>4</sub> | 0  | 0  | 0   | 0   | 0   | 0   |
|         | R <sub>5</sub> | 0  | 0  | 0   | 0   | 0   | 1   |

Done by  
M. RAMACHANDRAN  
M.P. M.

  
21/7/2018.

24/7/18

Bioassay : Repellent activity (Y-tube) ✓

Target Pest : Tribolium castaneum adult ✓

Treatment source : Callistemon citrinus essential oil

Concentrations : 5 $\mu$ l, 10 $\mu$ l, 15 $\mu$ l, 20 $\mu$ l ✓

Study Period : 24h.

Replication : 3

No. of insect/Replicate : 50

| Exposure time<br>24h | Concentrations | Adult Repellency |    |                |    |                |    |
|----------------------|----------------|------------------|----|----------------|----|----------------|----|
|                      |                | Replication      |    |                |    |                |    |
|                      |                | R <sub>1</sub>   |    | R <sub>2</sub> |    | R <sub>3</sub> |    |
|                      |                | T                | C  | T              | C  | T              | C  |
|                      | 5 $\mu$ l      | 16               | 33 | 17             | 32 | 18             | 32 |
|                      | 10 $\mu$ l     | 9                | 38 | 8              | 40 | 8              | 39 |
|                      | 15 $\mu$ l     | 3                | 45 | 2              | 47 | 3              | 47 |
|                      | 20 $\mu$ l     | 0                | 45 | 0              | 47 | 0              | 49 |

Done by  
M. RAMACHANDRAN  
M. R. M.

*[Signature]*  
20/08/2018

Page 7: Minimal data for adult repellent activity - for Manuscript Table 5

2/18/18

# Bioassay

10: Repellent activity (chole-based method)

Target pest

10: Tribolium castaneum Larvae

Treatment source

: Callistemon Citrinus essential oil

Concentrations

: 50µl, 10µl, 15µl, 20µl ✓

Study period

: 2h, 4h, 6h, 12h, 24h

Replication

: 5

No. of insect/replicate

: 25

| Concentration<br>&<br>Replicate | Larval Repellency |    |    |    |    |    |     |    |     |    |
|---------------------------------|-------------------|----|----|----|----|----|-----|----|-----|----|
|                                 | Exposure Time     |    |    |    |    |    |     |    |     |    |
|                                 | 2h                |    | 4h |    | 6h |    | 12h |    | 24h |    |
|                                 | T                 | C  | T  | C  | T  | C  | T   | C  | T   | C  |
| 5µl<br>R <sub>1</sub>           | 9                 | 16 | 9  | 16 | 9  | 16 | 9   | 16 | 8   | 16 |
| R <sub>2</sub>                  | 9                 | 16 | 9  | 16 | 9  | 16 | 8   | 16 | 7   | 16 |
| R <sub>3</sub>                  | 8                 | 14 | 8  | 14 | 7  | 14 | 7   | 14 | 7   | 14 |
| R <sub>4</sub>                  | 9                 | 15 | 9  | 15 | 9  | 15 | 9   | 15 | 9   | 15 |
| R <sub>5</sub>                  | 10                | 13 | 10 | 13 | 11 | 14 | 11  | 14 | 9   | 14 |

Done BY  
M. RAMACHANDRAN  
M.P. Ma.

Continued -  
~~Signature~~  
22/08/18



|      |                | 2h |    | 4h |    | 6h |    | 12h |    | 24h |    |
|------|----------------|----|----|----|----|----|----|-----|----|-----|----|
|      |                | T  | C  | T  | C  | T  | C  | T   | C  | T   | C  |
| 10hd | R              | 7  | 18 | 7  | 18 | 7  | 18 | 7   | 18 | 6   | 19 |
|      | R <sub>2</sub> | 7  | 18 | 7  | 18 | 7  | 18 | 7   | 18 | 6   | 19 |
|      | R <sub>3</sub> | 7  | 18 | 7  | 18 | 7  | 18 | 7   | 18 | 7   | 18 |
|      | R <sub>4</sub> | 7  | 16 | 7  | 16 | 7  | 16 | 7   | 18 | 7   | 18 |
|      | R <sub>5</sub> | 8  | 16 | 8  | 17 | 8  | 17 | 8   | 17 | 8   | 17 |
| 15hd | R              | 5  | 20 | 5  | 20 | 5  | 20 | 4   | 21 | 4   | 21 |
|      | R <sub>2</sub> | 5  | 20 | 5  | 20 | 5  | 20 | 4   | 21 | 4   | 21 |
|      | R <sub>3</sub> | 5  | 19 | 5  | 20 | 5  | 20 | 5   | 20 | 5   | 20 |
|      | R <sub>4</sub> | 4  | 19 | 4  | 19 | 4  | 21 | 5   | 20 | 4   | 20 |
|      | R <sub>5</sub> | 4  | 18 | 4  | 18 | 4  | 21 | 5   | 20 | 5   | 20 |
| 20hd | R              | 3  | 18 | 3  | 22 | 2  | 22 | 2   | 23 | 0   | 23 |
|      | R <sub>2</sub> | 3  | 18 | 3  | 22 | 2  | 22 | 2   | 22 | 2   | 22 |
|      | R <sub>3</sub> | 4  | 19 | 4  | 21 | 3  | 21 | 3   | 22 | 0   | 22 |
|      | R <sub>4</sub> | 3  | 18 | 3  | 22 | 2  | 22 | 2   | 23 | 1   | 23 |
|      | R <sub>5</sub> | 3  | 18 | 3  | 22 | 2  | 22 | 2   | 22 | 1   | 22 |

Done BY  
M. DAMACHANDRAN  
M.D.M.

*[Signature]*  
22/08/2018

Page 8-9: Minimal data for larval repellent activity -  
for Manuscript Table 5
